# Supplementary material for: hTERT-immortalized gingival fibroblasts respond to cytokines but fail to mimic primary cell responses to Porphyromonas gingivalis
Source: PubMed Central journal article supplement (PMC8144196; doi:10.1038/s41598-021-90037-5), 2021-05-24
Supplement: 41598_2021_90037_MOESM1_ESM.pdf [file 41598_2021_90037_MOESM1_ESM.pdf]

# hTERT-immortalized gingival fibroblasts respond to cytokines but fail to mimic primary cell responses to *Porphyromonas gingivalis*

Katarzyna B Lagosz-Cwik\*, Aleksandra Wielento\*, Weronika Lipska, Malgorzata Kantorowicz, Dagmara Darczuk, Tomasz Kaczmarzyk, Susan Gibbs, Jan Potempa and Aleksander M Grabiec

\*These authors contributed equally to this work.

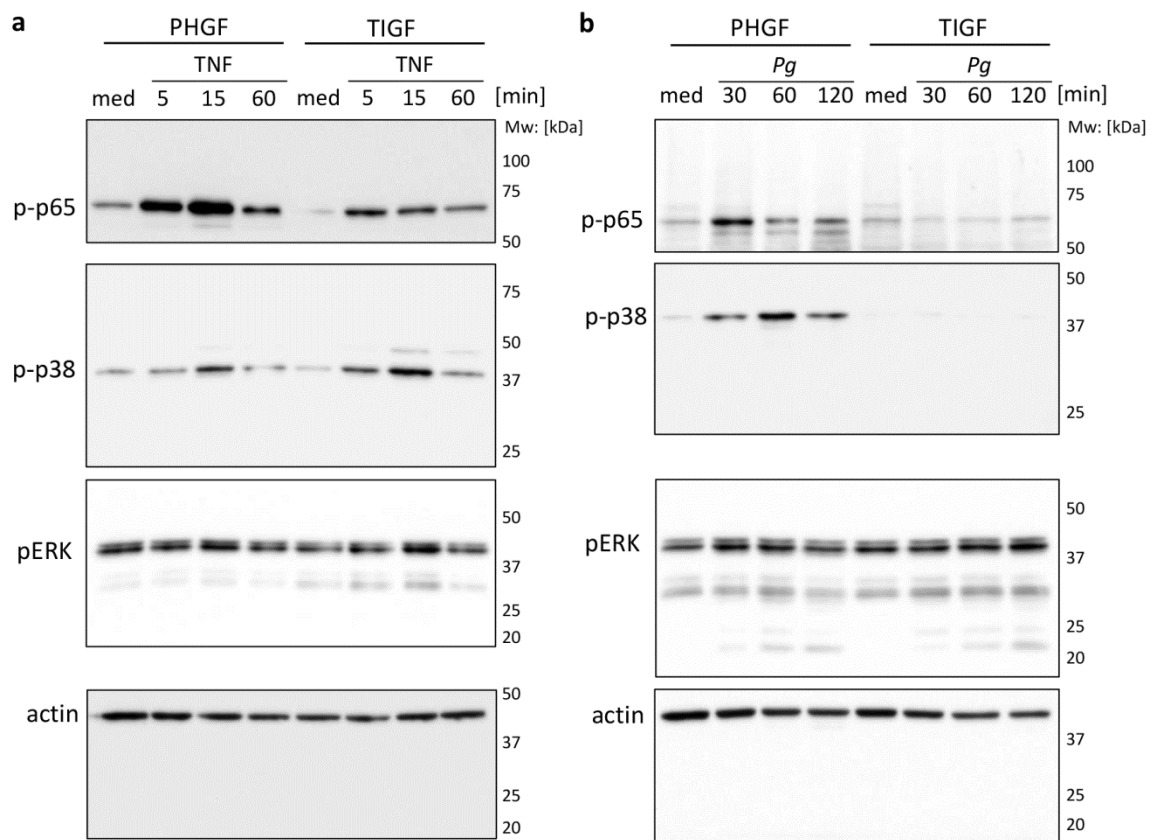

**Supplementary Figure S1.** Western blot analysis of p65, p38, and ERK phosphorylation in PHGFs and TIGFs (a) after stimulation with TNF (10 ng/ml) or (b) upon infection with *P. gingivalis* (MOI 50) for the indicated time points (in minutes). Actin was used as loading control. Some membranes were cut at ~50-60 kDa and their top and bottom parts were used to visualize different proteins.

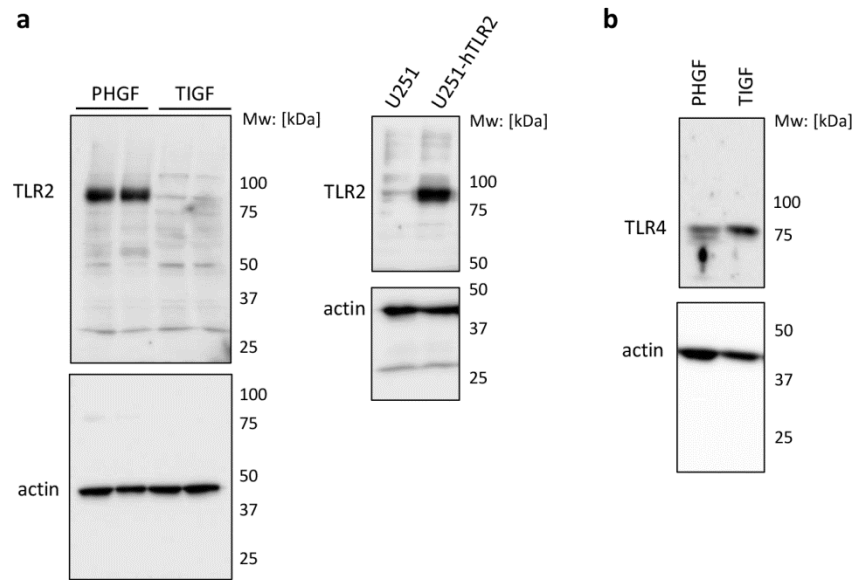

**Supplementary Figure S2.** Western blot analysis of TLR2 and TLR4 protein expression in total cell lysates of PHGF and TIGF. **(a)** U-251 MG cells overexpressing hTLR2 were used as a positive control and actin was used as a loading control. In the right panel, one membrane cut at 50 kDa was used to visualize TLR2 (top part of the membrane showing molecular weights >50 kDa) and actin (bottom part of the membrane showing molecular weights <50 kDa). **(b)** One membrane cut at ~55 kDa was used to visualize TLR4 (top part of the membrane showing molecular weights >55 kDa) and actin (bottom part of the membrane showing molecular weights <55 kDa).

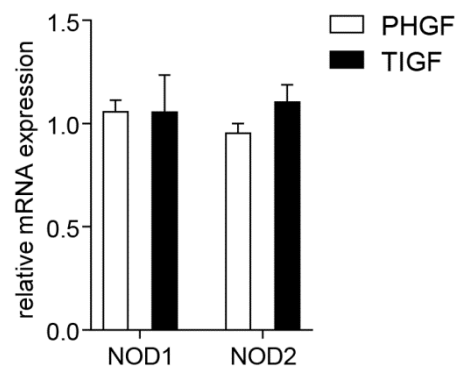

**Supplementary Figure S3.** PHGFs and TIGF express comparable levels of NOD1 and NOD2. NOD1 and NOD2 expression in PHGFs and TIGFs (n=2) was analyzed by qPCR and shown as mean relative mRNA expression + SEM.
